# Supplementary material for: Biodiversity of Mycobacterium tuberculosis in Bulgaria Related to Human Migrations or Ecological Adaptation
Source: MDPI journal article supplement (doi:10.3390/microorganisms10010146), 2022-01-11
Supplement: s1 [file s1]

**Table S1.** Dominant *M. tuberculosis* lineages throughout the geographic regions (modern countries) crossed by the Gypsies and the Turks during their migration to Bulgaria and Europe.

| Gypsy migration | Dominant Lineages                                    | Ref.                 | Migration of the Turks | Dominant Lineages                                   | Ref.          |
|-----------------|------------------------------------------------------|----------------------|------------------------|-----------------------------------------------------|---------------|
| India           | L1/EAI-45%<br>L2/Beijing-7%<br>L3/CAS-22%<br>L4 - 8% | 1, 2, 6, 9, 14       | Kazakhstan             | L2/Beijing-80%<br>L4-20%                            | 9, 13, 15     |
| Pakistan        | L1/EAI-10%<br>L3/CAS-65%<br>L4-8%                    | 1, 2, 6, 9           | Turkmenistan           | L2/Beijing-50%<br>L3/CAS-7%<br>L4-40%               | 1, 9, 15      |
| Afghanistan     | L3/CAS-28%                                           | 2, 3, 6, 9           | Kyrgyzstan             | L2/Beijing-60%<br>L4-40%                            | 16,18         |
| Iran            | L1/EAI-13%<br>L2/Beijing-8%<br>L3/CAS-19%<br>L4/45%  | 1, 2, 3, 4, 6, 9     | Azerbaijan             | L2>50-70%<br>L4-20%                                 | 1, 9          |
| Iraq            | L3/CAS-41%<br>L4-39%                                 | 1, 2, 5, 9           | Georgia                | L1/EAI-2%<br>L2/Beijing-26%<br>L4-70%               | 1, 8, 9       |
| Syria           | L4>90%                                               | 1, 17                | Iran                   | L1/EAI-13%<br>L2/Beijing-8%<br>L3/CAS-19%<br>L4/45% | 1, 2, 3, 6, 9 |
| Turkey          | L4>95%<br>L1/EAI-1%; L2/Beijing-1%; L3/CAS – 1%      | 1,3,7,9,10, 11,12,19 | Iraq                   | L3/CAS-41%<br>L4-39%                                | 1, 2, 5, 9    |
| Bulgaria        | L4-99%<br>L2/Beijing-1%                              | This study           | Syria                  | L4>90%                                              | 1, 17         |

## References:

- Couvin, D.; David, A.; Zozio, T.; Rastogi, N. Macro-geographical specificities of the prevailing tuberculosis epidemic as seen through SITVIT2, an updated version of the *Mycobacterium tuberculosis* genotyping database. *Infect Genet Evol* **2018**, *72*, 31-43. doi: 10.1016/j.meegid.2018.12.030.
- Couvin D, Reynaud Y, Rastogi N. Two tales: Worldwide distribution of Central Asian (CAS) versus ancestral East-African Indian (EAI) lineages of *Mycobacterium tuberculosis* underlines a remarkable cleavage for phylogeographical, epidemiological and demographical characteristics. *PLoS One*. 2019 Jul 12;14(7):e0219706. doi:
- Merza, M. A.; Farnia, P.; Salih, A. M.; Masjedi, M. R.; Velayati, A. A. The most predominant spoligopatterns of *Mycobacterium tuberculosis* isolates among Iranian, Afghan-immigrant, Pakistani and Turkish tuberculosis patients: a comparative analysis. *Chemotherapy*. **2010**, *56*(3), 248-257. doi: 10.1159/000316846.
- Hadifar, S.; Fateh, A.; Pourbarkhordar, V.; Siadat, S. D.; Mostafaei, S.; Vaziri, F. Variation in *M. tuberculosis* population structure in Iran: a systemic review and meta-analysis. *BMC Infect Dis*. **2021**, *4*, 21. doi: 10.1186/s12879-020-05639-7
- Ahmed, M. M.; Mohammed, S. H.; Nasurallah, H. A.; Ali, M. M.; Couvin, D.; Rastogi, N. Snapshot of the genetic diversity of *Mycobacterium tuberculosis* isolates in Iraq. *Int J Mycobacteriol* **2014**, *3*(3), 184-196. doi: 10.1016/j.ijmyco.2014.07.006.
- Netikul, T.; Palittapongarnpim, P.; Thawornwattana, Y.; Plitphonganphim, S. Estimation of the global burden of *Mycobacterium tuberculosis* lineage 1. *Infect Gen Evol* **2021**, *91*, 104802. https://doi.org/10.1016/j.meegid.2021.104802.
- Karagoz, A.; Tutun, H.; Altintas, L.; Alanbayi, U.; Yildirim, D.; Kocak, N. Molecular typing of drug-resistant *Mycobacterium tuberculosis* strains from Turkey. *J Glob Antimicrob Resist* **2020**, *23*, 130-134, https://doi.org/10.1016/j.jgar.2020.08.012.
- Niemann, S.; Diel, R.; Khechinashvili, G.; Gegia, M.; Mdivani, N.; Tang, Y. W. *Mycobacterium tuberculosis* Beijing lineage favors the spread of multidrug-resistant tuberculosis in the Republic of Georgia. *J Clin Microbiol* **2010**, *48*, 3544-3550. doi: 10.1128/JCM.00715-10.

9. O'Neill, M.; Shockey, A.; Zarley, A.; Aylward, W.; Eldholm, V.; Kitchen, A.; Pepperell, C. Lineage specific histories of *Mycobacterium tuberculosis* dispersal in Africa and Eurasia. *Mol Ecol* **2019**, 28(13), 3241-3256. doi: 10.1111/mec.15120.
10. Gencer, B.; Shinnick, T. M. Molecular genotyping of *Mycobacterium tuberculosis* isolates from Turkey. *Am J Infect Dis* **2005**, 1, 5-11.
11. Durmaz, R.; Zozio, T.; Gunal, S.; Yaman, C.; Cavusoglu, A.; Guney, C.; et al. Genetic diversity and major spoligotype families of drug-resistant *Mycobacterium tuberculosis* clinical isolates from different regions of Turkey. *Infect Genet Evol* **2007**, 7, 513-519, <https://doi.org/10.1016/j.meegid.2007.03.003>.
12. Kisa, O.; Tarhan, G.; Gunal, S.; Albay, A. Durmaz, R.; Saribas, Z.; et al. Distribution of spoligotyping defined genotypic lineages among drug-resistant *Mycobacterium tuberculosis* complex clinical isolates in Ankara, Turkey. *PLoS ONE* **2012**, 7(1): e30331. <https://doi.org/10.1371/journal.pone.0030331>.
13. Klotoe, B.J.; Kacimi, S.; Costa-Conceição, E. I.; Gomes, H.M.; Barcellos, R.B.; Panaiotov, S.; Haj Slimene, D.; Sikhayeva, D.; Sengstake, S.; Schuitema, A.R.; Akhalaia, M.; Alenova, A.; Zholdybayeva, E.; Tarlykov, P.; Anthony, R.; Refregier, G.; Sola, C. Genomic characterization of MDR/XDR-TB in Kazakhstan by a combination of high-throughput methods predominantly shows the ongoing transmission of L2/Beijing 94-32 central Asian/Russian clusters. *BMC Infect Dis* **2019**, 19, 553. <https://doi.org/10.1186/s12879-019-4201-2>.
14. Poonawala, H.; Kumar, N.; Peacock, S.J. A review of published spoligotype data indicates the diversity of *Mycobacterium tuberculosis* from India is under-represented in global databases. *Infect Genet Evol* **2020**, 78:104072. doi: 10.1016/j.meegid.2019.104072.
15. Cox, H. S.; Kubica, T.; Doshetov, D.; Kebede, Y.; Gerdess, S.R.; Niemann, S. The Beijing genotype and drug resistant tuberculosis in the Aral Sea region of Central Asia. *Respir Res* **2005**, 6, 134, <https://doi.org/10.1186/1465-9921-6-134>.
16. Mokrousov, I.; Isakova, J.; Valcheva, V.; Aldashev, A.; Rastogi, N. Molecular snapshot of *Mycobacterium tuberculosis* population structure and drug-resistance in Kyrgyzstan. *Tuberculosis (Edinb)* **2013**, 93(5), 501-507. doi: 10.1016/j.tube.2013.05.008.
17. Zarziur, H.; Madania, A.; Ghoury, I.; Habous, M. High resolution genotyping of *M. tuberculosis* isolates from Syria using MIRU-VNTR. *Biomed Biotechnol Res J*, **2019**, 3, 1-8, DOI: 10.4103/bbrj.bbrj\_139\_18.
18. Engström, A.; Antonenka, U.; Kadyrov, A.; Kalmambetova, G.; Kranzer, K.; Merker, M.; Kabirov, O.; Parpieva, N.; Rajabov, A.; Sahalchik, E.; Sayfutdinov, Z.; Niemann, S.; Hoffmann, H. Population structure of drug-resistant *Mycobacterium tuberculosis* in Central Asia. *BMC Infect Dis* **2019**, 19, 908, <https://doi.org/10.1186/s12879-019-4480-7>
19. Zozio, T.; Allix, C.; Gunal, S.; Saribas, Z.; Alp, A.; Durmaz, R.; Fauville-Dufaux, M.; Rastogi, N.; Sola, C. Genotyping of *Mycobacterium tuberculosis* clinical isolates in two cities of Turkey: Description of a new family of genotypes that is phylogeographically specific for Asia Minor. *BMC Microbiol* **2005**, 5, 44, <https://doi.org/10.1186/1471-2180-5-44>.

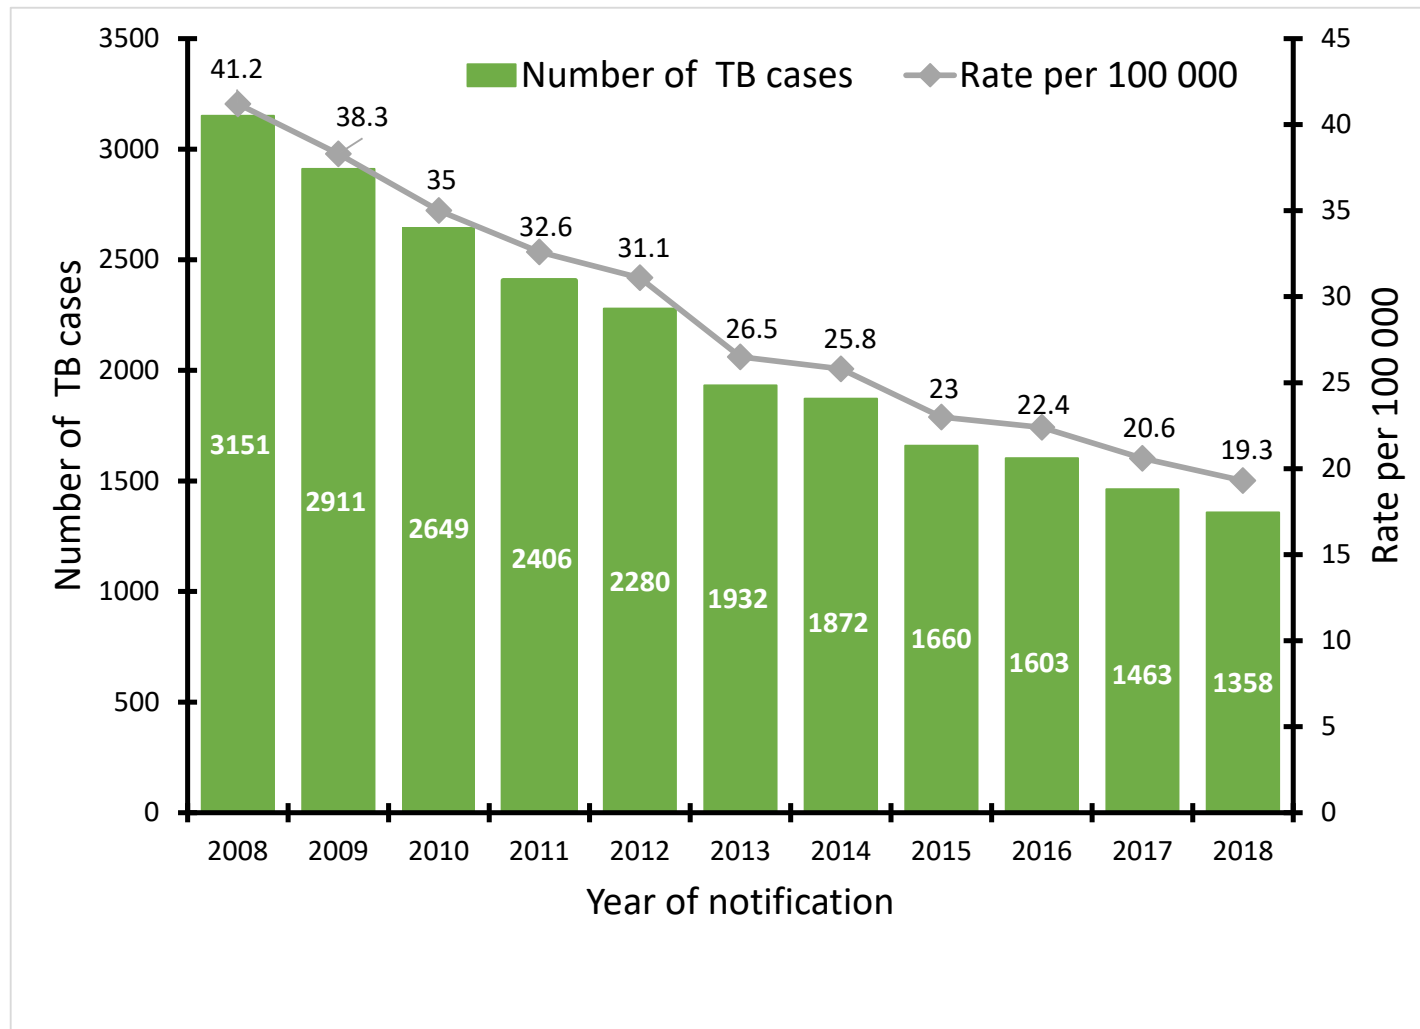

**Figure S1.** Number of TB cases and notification rates in Bulgaria, 2008–2018.
